## SUPPA2 provides fast, accurate, and uncertainty-aware differential splicing analysis across multiple conditions

Juan L. Trincado<sup>1,\*</sup>, Juan C. Entizne<sup>2,\*</sup>, Gerald Hysenaj<sup>3</sup>, Babita Singh<sup>1</sup>, Miha Skalic<sup>1</sup>, David J. Elliott<sup>3</sup>, Eduardo Eyra<sup>1,4</sup>

<sup>1</sup>Pompeu Fabra University, E08003, Barcelona, Spain

<sup>2</sup>University of Dundee, Invergowrie, Dundee DD2 5DA, UK

<sup>3</sup>Institute of Genetic Medicine, Newcastle University, Central Parkway, Newcastle NE1 3BZ, UK.

<sup>4</sup>ICREA, E08010, Barcelona, Spain

\* equal contribution

Corresponding author: [eduardo.eyras@upf.edu](mailto:eduardo.eyras@upf.edu)

### Abstract

Despite the many approaches to study differential splicing from RNA-seq, many challenges remain unsolved, such as computing capacity and sequencing depth requirements. We present SUPPA2, a new method for differential splicing that addresses these challenges and enables streamlined analysis across multiple conditions taking into account biological variability. Using experimental and simulated data, SUPPA2 achieves higher accuracy compared to other methods; especially, at low sequencing depth and short read length, with important implications for cost-effective use of RNA-seq for splicing. We further analyzed two differentiation series to support the applicability of SUPPA2 for the robust investigation of splicing beyond binary comparisons.

**Keywords:** differential splicing, alternative splicing, RNA-seq, uncertainty, biological variability, differentiation

## Introduction

Alternative splicing is related to a change in the relative abundance of transcript isoforms produced from the same gene (Lee and Rio 2015). Multiple approaches have been proposed to study differential splicing from RNA sequencing (RNA-seq) data (Alamancos et al. 2014; Lahat and Grellscheid 2016). These methods generally involve the analysis of either transcript isoforms (Trapnell et al. 2013; Sebestyen et al. 2015; Nowicka and Robinson 2016; Froussios et al. 2017), clusters of splice-junctions (Hu et al. 2013; Vaquero-Garcia et al. 2016), alternative splicing events (Katz et al. 2010; Shen et al. 2014) or exonic regions (Anders et al. 2012). Relative abundances of the events or transcript isoforms are generally described in terms of a percentage or proportion spliced-in (PSI) and differential splicing is given in terms of the difference of the relative abundances, or  $\Delta$ PSI, between conditions (Wang et al. 2008; Venables et al. 2008). PSI values estimated from RNA-seq data have shown a good agreement with independent experimental measurements, and the magnitude of  $\Delta$ PSI represents a good indicator of biological relevance (Katz et al. 2010; Venables et al. 2013). Despite the multiple improvements achieved by recent analysis methods, many challenges remain unsolved. These include the limitations in processing time for current methods, the computational and storage capacity required, as well as the constraints in the number of sequencing reads needed to achieve high enough accuracy.

An additional challenge for RNA-seq analysis is the lack of robust methods to account for biological variability between replicates or to perform meaningful analyses of differentially splicing across multiple conditions. Although many methods assess the estimation uncertainty of the splicing event or transcript isoforms (Katz et al. 2010; Shen et al. 2014; Anders et al. 2012), they generally do that on individual events rather than considering the genome-wide distribution. Additionally, most methods determine the significance of differential splicing performing tests directly on read counts, leaving the selection of relevant  $\Delta$ PSI values to an arbitrary cut-off. In other cases, fold-changes instead of  $\Delta$ PSI are given, which are even harder to interpret in terms of splicing changes.

We showed before that transcriptome quantification could be leveraged for the fast estimate of event PSI values with high accuracy comparing with experimental and simulated datasets (Alamancos et al. 2015). We now present here a new method for analyzing differential splicing, SUPPA2, which builds upon these principles to address the current challenges in the study of differential splicing, and taking into account biological variability. Compared with other existing

approaches for differential splicing analysis with RNA-seq data, SUPPA2 provides several advantages. SUPPA2 can work with multiple replicates per condition and with multiple conditions. Additionally, SUPPA2 estimates the uncertainty of  $\Delta$ PSI values as a function of the expression of transcripts involved in the event, taking into account all events genome-wide to test the significance of an observed  $\Delta$ PSI, hence directly estimating the biological relevance of the splicing change without relying on arbitrary  $\Delta$ PSI cut-offs. Moreover, SUPPA2 incorporates the possibility to perform clustering of differentially spliced events across multiple conditions to identify groups of events with similar splicing patterns and common regulatory mechanisms. In conclusion, SUPPA2 enables cost-effective use of RNA-seq for the robust and streamlined analysis of differential splicing across multiple biological conditions. The software described here is available at <https://github.com/comprna/SUPPA>

## Results

### **SUPPA2 monitors uncertainty to determine differential splicing**

We showed before that the inclusion levels of alternative splicing events can be readily calculated from transcript abundances estimated from RNA-seq data with good agreement with experimental measurements and with other methods based on local measurements of splicing (Alamancos et al. 2015). SUPPA2 extends this principle to measure differential splicing between conditions by exploiting the variability between biological replicates to determine the uncertainty in the PSI values (see Methods). To illustrate our approach and to evaluate the dynamic range of SUPPA2 we used it to analyze RNA-seq data obtained after the double knockdown of TRA2A and TRA2B splicing regulators compared with controls (Best et al. 2014) (Fig. 1a). The differences in PSI value for each event between biological replicates are higher at low expression, in agreement with the expected higher variability at low read count. This biological variability provides information on the uncertainty of the PSI estimates. The significance of an observed  $\Delta$ PSI value between conditions will depend on where in the distribution of the uncertainty falls. A large splicing change ( $|\Delta$ PSI| value) may not be significant if it falls with a range of high uncertainty, whereas a small splicing change may be defined as robustly significant if it falls in the low uncertainty range. SUPPA2 estimates the significance considering the distribution between replicates for all events with similar transcript abundance; hence, it provides a lower bound for significant  $|\Delta$ PSI| values that vary with the expression of the

transcripts describing the event (Fig. 1b) (see Methods). The description of the uncertainty in terms of transcript abundances (TPM) rather than read counts provides several advantages. These include speed, as there is no need to store or go back to read information, as well as interpretability and application range, as transcript abundances are already normalized for transcript length and remain stable at different library sizes. More details on these advantages are provided below.

We compared SUPPA2 results with three other methods that calculate differential splicing using multiple replicates per condition: rMATS (Shen et al. 2014) and MAJIQ (Vaquero-Garcia et al. 2016), which describe changes in terms of  $\Delta$ PSI, and DEXSeq (Anders et al. 2012), which uses fold-changes. Importantly, we found that SUPPA2 was much faster than the other methods, devoting 24 seconds to the PSI quantification and about 32 minutes and 47 seconds for differential splicing analysis on the same datasets (Fig. 1c). Since SUPPA2 performs the significance test directly on the  $\Delta$ PSI values without needing to go back to the read data, it hence provides unmatched speed for differential splicing analysis. Comparing the results obtained with each method (Figure S1), we observed that rMATS and DEXSeq detect many significant events with small inclusion changes that are not distinguishable from the variability between biological replicates, whereas SUPPA2 and MAJIQ separates well these two distributions. As SUPPA2 exploits the between-replicate variability to test for significance, it avoids the use of an arbitrary global  $|\Delta$ PSI| threshold to identify biologically relevant events and detects significant events across a wide range of gene expression values (Figure S1).

### **SUPPA2 provides high accuracy at low sequencing depth and with short read lengths**

To test the accuracy of SUPPA2 with different sequencing settings and compare it with other methods, we simulated 277 differentially spliced cassette events with  $|\Delta$ PSI $>0.2$  between two conditions with 3 replicates per condition (see Methods). To perform a balanced comparison, we considered the same number of negative controls, 277, consisting of different cassette events with arbitrary PSI values but with no change between conditions (Table S1) (Methods). We simulated genome-wide RNA-seq reads using RSEM (Li and Dewey 2011) at different sequencing depths: 120, 60, 25, 10 and 5 millions of paired-end 100nt reads per sample; and for different read-lengths: 100, 75, 50 and 25nt at fixed depth, 25M paired-end reads. Despite the differences in the numbers and length of the reads (Table S2), the genes containing the positive and negative events used for benchmarking showed similar distributions of expression

values at all depths and read lengths (Figures S2a and S2b). We calculated differentially spliced events with SUPPA2, rMATS, MAJIQ and DEXSeq and evaluated the detection rate and accuracy on the simulated events (Table S3). The detection rate was calculated as the proportion of simulated positive and negative cassette events that each method was able to measure from the RNA-seq data, i.e. the event was recovered regardless of whether it was detected as significant. The detection rate of SUPPA2 was higher than rMATS and MAJIQ at low sequencing depths (Fig. 2a) and with shorter read lengths (Fig. 2b) for simulated positive and negative events (Figures S2c-S2d). The detection rate of positive events was similar for SUPPA2 and DEXSeq, whereas for negative events SUPPA2 had a higher detection rate across all depths and read-lengths (Figures S2c-S2d) (Table S3).

We also measured the true positives, i.e. the positive events that were observed to change significantly and in the same direction by each method; and the false positives, i.e. the negative events predicted to change significantly. At low depth and for shorter reads SUPPA2 recovered a high proportion of true positives compared to the other methods (Figs. 2c and 2d), regardless of whether a true positive was considered only based on the significance test, or imposing in addition the cutoff  $|\Delta\text{PSI}| > 0.2$  for the predictions (Table S3). In contrast, some of the other methods had a reduced proportion of true positives at low depth and shorter read length, probably owing to them relying on having sufficient junction and/or exonic reads. Additionally, even though SUPPA2 recovered in general more negative events, the false positive rate remained low compared to the other methods, and below  $< 1\%$  for all conditions (Table S3).

We also considered an unbalanced configuration where one biological replicate had 120M reads and the other two replicates had 10M reads. In this hybrid configuration, SUPPA2 recovered a high number of events and high number of true positives (Table S3). Importantly, although MAJIQ showed a high detection rate and accuracy in the unbalanced configuration, it had to be run with specialized parameters (Methods), whereas SUPPA2 was run in the same way for all cases. Additionally, SUPPA2 also showed high correlation values, similar to those obtained with rMATS and MAJIQ, between the predicted and simulated  $\Delta\text{PSI}$  values (Figures S2e-S2f) (Table S3) in the same simulated conditions. This simulated benchmarking indicates that SUPPA2 provides competitive results at very different configurations of sequencing depth and read length.

**SUPPA2 provides accurate splicing change quantification compared with experimental**

## results

To further evaluate the accuracy of SUPPA2 in recovering  $\Delta$ PSI values we used 83 events that were validated experimentally by RT-PCR upon TRA2A and TRA2B knockdown compared to control cells (Table S4) (Methods) (Best et al. 2014). For each method, we compared the  $\Delta$ PSI estimated from RNA-seq with the  $\Delta$ PSI from RT-PCR. SUPPA2 agreement to the RT-PCR  $\Delta$ PSI values was similar to rMATS and MAJIQ (Fig. 3a) (Table S5). Using two other independent RT-PCR datasets published previously (Vaquero-Garcia et al. 2016), SUPPA2 also showed similar accuracy compared to rMATS and MAJIQ (Figures S3a and S3b) (Tables S6-S9). Finally, using 44 RT-PCR negative cassette events that did not show any significant change upon the double knockdown of TRA2A and TRA2B, SUPPA2 had a lower false positive rate compared to the other methods, either before (Fig. 3b) or after applying a  $|\Delta$ PSI $>0.1$  cut-off (Tables S10-S11).

### High discrepancy of differentially spliced events across methods

The results described above suggest a general agreement between the different methods in the detection of significant differentially spliced events. To assess this question, we performed a direct comparison of the results obtained from the four methods SUPPA2, rMATS, MAJIQ and DEXSeq, using the same RNA-seq data for the knockdown of TRA2A and TRA2B compared with controls (Best et al. 2014). Since exon cassette events are the most frequent form of splicing variation (48.71% of events from the human Ensembl annotation) compared to alternative splice-sites (37.71%), mutual exclusion (6.22%) or intron-retention (7.36%), we decided to match exon cassette events across all four methods. We were able to identify 7116 cassette exons unambiguously detected by all four methods, i.e. they were measured and tested for significance by all methods (Figure S4a) (Table S12) (Methods). We also found a large disagreement between the events predicted as significant by each method (Figure S4a). From these 7116 cassette events, each method found between 133 and 274 events to be significant, with 370 events predicted as significant by any one method, but only 22 events predicted by all four methods (Figure S4b). Moreover, events detected by a larger number of methods tended to have higher  $\Delta$ PSI values (Figure S4c) and covered a smaller range of gene expression (Figure S4d). Despite this low overlap, the significant events predicted by each method independently showed enrichment of TRA2B CLIP tags and of Tra2 binding motifs on the alternative exons (Table S13) (Supplementary Methods). Thus, although each method

provided a different set of differentially spliced events, each set independently had the expected properties related to the knockdown experiment. It is possible that each method describes a different subset of changes and generally misses others. To seek further support for this point, we selected for experimental validation 15 exon cassette events that had CLIP tags and Tra2 motifs nearby the regulated exon, 6 of them were predicted by SUPPA2 but not by any other method, and the other 9 were not predicted by any of the four methods, but were significant according to SUPPA2 before multiple test correction (Table S14). From these 15 events, 5 of them only showed one PCR band. For the rest, 7 changed significantly according to the RT-PCR, with 6 of them changing in the same direction predicted by SUPPA2. Overall, 9 events changed in the same direction as predicted (Fig. 3c) (Table S14). In particular, we validated a new event in *EML4* (Fig. 3d), a gene involved in cancer through a fusion with *ALK* that is not present in MDA-MB-231 cells (Lin et al. 2009). We conclude that different methods may still miss novel experimentally reproducible events, which can be suggested by SUPPA2.

### **SUPPA2 finds biologically relevant event clusters across multiple conditions**

SUPPA2 is also able to analyze multiple conditions by computing the pairwise differential splicing between conditions, and can detect groups of events with similar splicing patterns across conditions using density-based clustering (Methods). To evaluate the ability of SUPPA2 to cluster events, we analyzed a 4-day time-course of differentiation of human iPSCs into bipolar neurons (Buskamp et al. 2014), which had not been analyzed yet for alternative splicing. SUPPA2 identified 2197 regulated cassette events ( $|\Delta\text{PSI}| > 0.1$ , corrected p-value  $< 0.05$ ), out of which 186 (8,4%) were microexons (length  $< 28\text{nt}$ ), which represent an enrichment (Fisher's exact test p-value  $< 2.2\text{e-}16$ , odds-ratio = 4.702) comparing to a set of 2011 non-regulated cassette events ( $|\Delta\text{PSI}| < 0.03$ , corrected p-value  $> 0.1$ ). We evaluated the performance of the two density-based cluster methods implemented in SUPPA2, DBSCAN (Ester et al. 1996) and OPTICS (Ankerst et al. 1999), using different input parameters. In spite of OPTICS requiring more time than DBSCAN (43s vs 5s), it produced slightly better clustering results (Figures S5a-S5d) (Table S15). For a maximum reachability distance of 0.11, i.e. maximum distance of an event to a cluster to be considered part of the cluster, we obtained 3 well-differentiated clusters (silhouette score = 0.572) (Figs. 4a-c) (Table S16). Cluster 0 increased inclusion at late steps of differentiation and showed an enrichment in microexons (32 out of 115 events) with respect to unclustered regulated cassette events (Fisher's exact test p-value = 0.0148, odds-ratio = 5.3521). In contrast, clusters 1 and 2 decreased inclusion with

differentiation, and contained 2 (out of 20 events) and no microexons, respectively. These results are in agreement with the previously observed enrichment of microexon inclusion in differentiated neurons (Irimia et al. 2014; Li et al. 2015).

To further validate the findings with SUPPA2, we performed a motif enrichment analysis in regulated events compared to non-regulated events. Notably, although the 2197 regulated events did not show any enrichment in motifs for RNA binding proteins (RBPs), events in clusters were enriched in, among others, CELF, RBFOX, ESRP, MBNL and SRRM4 motifs (Fig. 4d-4f), in concordance with the described role of *CELF*, *RBFOX* and *SRRM4* genes in neuronal differentiation (Kim et al. 2013b; Raj et al. 2014; Norris et al. 2014; Li et al. 2015). Consistent with this, *SRRM4* and members of the *CELF* and *RBFOX* families showed upregulation at the initial steps of iPSC differentiation into neurons (Figure S5) (Table S17). On the other hand, *CELF5*, *ESRP1* and *ESRP2* were downregulated during differentiation. The genes *MBNL2* and *MBNL3* showed first upregulation at stage 1, and downregulation at later stages (Figure S5) (Table S17). Notably, we found that only the cluster enriched in microexon splicing inclusion showed an enrichment of SRRM4 motifs upstream of the regulated exons, which agrees with recent reports describing SRRM4 binding upstream of microexons to regulate their inclusion in differentiated neurons (Raj et al. 2014), and further supports the specificity of SRRM4 to regulate microexons. Our results also suggest possible novel regulators of neuronal differentiation, such as the *MBNL* proteins in the regulation of events increasing inclusion, as well as *ESRP1*, *ESRP2*, and *RBM24* in events that decrease inclusion (Fig. 4d-4f).

We also used SUPPA2 to analyze differential splicing across 5 stages of erythroblast differentiation (Pimentel et al. 2014). In this case we considered all event types for clustering. For the optimal value of maximum reachability distance ( $S=0.1$ ), we obtained two homogeneous and well-differentiated clusters (silhouette score = 0.91), one for events with low PSI that increased at the last differentiation stage with 149 events, and a second cluster with 86 events that showed the opposite behaviour (Figure S6). In agreement with previous results (Pimentel et al. 2016), we observed an enrichment of intron retention events in the cluster of events that increased inclusion at the late differentiation stage, as compared with the other cluster, which does not include any retained intron (Fisher's exact test p-value = 0.04958). We conclude that SUPPA2 provides a powerful approach to analyze splicing across multiple conditions, validated not only by intrinsic measures of clustering consistency, but also by recovering known biological results and new features.



## Discussion

Our extensive evaluations here indicated that SUPPA2 provides a broadly applicable solution to current challenges in the analysis of differential splicing from RNA sequencing data across multiple conditions that will make it attractive to many potential users. SUPPA2 is faster than other methods, and maintains a high accuracy, especially at low sequencing depth and for short read-length. Despite using less reads or shorter reads, SUPPA2 could detect the majority of the simulated events and maintained a high proportion of true positives and low proportion of false positives. This offers an unprecedented opportunity to study splicing in projects with limited budget, or to reuse for splicing studies available sequencing datasets with lower depth than usually required by other methods. Additionally, the low computing and storage requirements of SUPPA2 makes possible to perform fast differential splicing processing and clustering analysis on a laptop. Thus, coupled with fast methods for transcript quantification (Patro et al. 2014, 2017; Bray et al. 2016), SUPPA2 facilitates the study of alternative splicing across multiple conditions without the need for large computational resources. The simplicity and modular architecture of SUPPA2 also makes it a very convenient tool in multiple contexts, as PSI values from other methods and for other event types, like complex events, or data types, like transcripts, can be used in SUPPA2 for differential splicing analysis or for clustering across conditions.

According to our simulated benchmarking analysis, as well as others published before, it may seem that bioinformatics methods used to analyze RNA-seq data tend to coincide on a large number of events. However, using real experimental data we observed low agreement between methods. These discrepancies can be explained by various factors: the different ways in which a splicing change is represented by each method, e.g. an event, an exon or a graph, how changes in splicing patterns are tested by each method, and how biological and experimental variability affects these tests. Intriguingly, the results from each method made sense biologically, i.e differentially spliced events were enriched in motifs and Protein-RNA interactions related to the depleted splicing factor. This makes it difficult to evaluate whether any one method provides a clear advantage in terms of the results and suggests that at least two or three methods should be used to identify all the possible significant splicing variants between different conditions. Yet, they could still miss some events. The fact that we could validate experimentally events not predicted by any other methods but suggested by SUPPA2 supports this point. We further observed that although most methods had the power to identify small

significant  $\Delta$ PSI values, different methods tended to agree on events with large splicing changes. Importantly, a fraction of these significant events with small  $\Delta$ PSI are indistinguishable from the variability observed between replicates and hence are not likely to be biologically relevant. SUPPA2 performs a statistical test that can separate significant splicing changes from the biological variability, providing thus an advantage to identify biologically relevant changes across wide range of expression values. By exploiting the biological variability, without having to go back to the read data, SUPPA2 provides a fast and accurate way to detect differential splicing without the need of arbitrary global  $\Delta$ PSI thresholds.

Although SUPPA2 relies on genome annotation to define events, poorly annotated genomes can be improved and extended before analysis by SUPPA2. In fact, recent analyses have shown that improved annotations lead to significantly better PSI estimates from RNA-seq when benchmarked to high-resolution RT-PCR measurements (Brown et al. 2016; Zhang et al. 2015, 2017). Current technological trends predict an increase in the number of efforts to improve the transcriptome annotation in multiple species and conditions (Garalde et al. 2016). In this direction, SUPPA2 could play a key role for the systematic and rapid genome-wide analysis of splicing following annotation and sample updates.

## Conclusions

In conclusion, the speed, modularity and accuracy of SUPPA2 enable cost-effective use of RNA sequencing for the robust and streamlined analysis of differential splicing across multiple biological conditions.

## Methods

### Differential splicing

SUPPA2 uses transcript quantification to compute inclusion values (PSI) of alternative splicing events across multiple samples. Given the calculated PSI values per sample, SUPPA2 considers two distributions: one for the  $\Delta$ PSI values between biological replicates and one for the  $\Delta$ PSI values between conditions. For the first distribution, for each event SUPPA2 calculates

the  $\Delta$ PSI value between each pair of biological replicates together with the average abundance of the transcripts describing the event across the same replicates:

$$E_{rep} = \frac{1}{|R_c|} \sum_{r \in R_c} \log_{10} \left( \sum_a TPM_{a,r} \right)$$

where  $r=1, \dots, |R_c|$  runs over the replicates in each condition  $c=1,2$ , and  $a$  indicates the two or more transcripts describing the event. For the distribution between conditions, the  $\Delta$ PSI values are calculated as the difference of the means in the two conditions, together with the average abundance of transcripts describing the event across both conditions for each event:

$$E_{cond} = \frac{1}{2} \sum_{c=1,2} \frac{1}{|R_c|} \sum_{r \in R_c} \log_{10} \left( \sum_a TPM_{a,r,c} \right)$$

Given the observed  $\Delta$ PSI and  $E_{cond}$  values for an event between conditions, its significance is calculated from the comparison with the  $\Delta$ PSI distribution between replicates for events with  $E_{rep}$  values in the neighborhood of the observed  $E_{cond}$ . This neighborhood is defined by first selecting the closest value  $E_{rep}^*$  from all points  $i$  from the between-replicate distribution:

$$E_{rep}^* = \min_i \{ |E_{i,rep} - E_{cond}| \}$$

using binary search and selecting a fixed number of events (1000 by default) around the  $E_{rep}^*$  value in the interval or ordered values. The selected events define an empirical cumulative density function (ECDF) over  $|\Delta$ PSI| from which a p-value is calculated:

$$p = (1 - ECDF(|\Delta PSI|)) / 2$$

Here we implicitly assume that the background distribution is symmetric. SUPPA2 includes an option to correct for multiple testing using the Benjamini-Hochberg method across all events from the same gene, as they cannot be considered to be entirely independent of each other, for which the false discovery rate (FDR) cut-off can be given as input.

## Clustering

SUPPA2 currently implements two density-based clustering methods: DBSCAN (Ester et al. 1996) and OPTICS (Ankerst et al. 1999). Density-based clustering has the advantage that one does not need to specify the expected number of clusters, and the choice between the two methods depends mainly on the computational resources and the amount of data. Both methods use the vectors of mean PSI values per event and require as input the minimum

number of events in a cluster (N), which could be interpreted as the minimum expected size of the regulatory modules. OPTICS also requires as the maximum reachability distance (S), which represents the maximum distance in PSI space of an event to a cluster. On the other hand, DBSCAN requires as input the maximum distance to consider two events as cluster partners (D), which OPTICS calculates through an optimization procedure allowing any value below S. DBSCAN allows to perform simple and fast data partitioning but has the drawback of being sensitive to the input parameters. On the other hand, OPTICS, which can be seen as a generalization of DBSCAN, explores the possible maximum values for D beyond which clustering quality drops. OPTICS can thus potentially produce better clustering results, since it is not limited to a fixed radius of clustering, but it is penalized by a greater computational cost. Clustering is performed only with events that change significantly in at least one pair of adjacent conditions. Three different distance metrics can be currently used: Euclidean, Manhattan and Cosine. Cluster qualities are reported using the silhouette score (Rousseeuw 1987), which indicates how well the events are assigned to clusters; and the root mean square standard deviation (RMSSTD), which measures the homogeneity of each cluster. Additionally, the number and percentage of events in clusters is also reported. Motif enrichment analysis was performed as before (Sebestyén et al. 2016) using MOSEA, available at <https://github.com/comprna/MOSEA>. Further details on the motif enrichment and analysis of differential expression are provided in the Supplementary Material.

## Simulated datasets

For the simulation we used the quantification of RefSeq transcripts for the 3 control samples from (Best et al. 2014) (GSE59335) with Salmon (Patro et al. 2017) as theoretical abundances, and considered 700 genes with only two isoforms containing any type of alternative splicing event (exon cassette, mutually exclusive, alternative 5'/3' splice-site or, intron retention) and with absolute difference of relative abundance between the two isoforms greater than 0.2:

$$\frac{|TPM_1 - TPM_2|}{TPM_1 + TPM_2} > 0.2 ,$$

We simulated differential splicing by exchanging their theoretical TPM values in a second condition for all three replicates, keeping the same theoretical abundances for all other transcripts. For the benchmarking analysis we used only the 277 (40%) cases with cassette events, as these were the most abundant type and the simplest one to match across methods. Additionally, we considered a negative set composed of 277 cassette events in 277 genes with

two isoforms sampled from the entire range of values for the difference of relative abundance between the isoforms. These 277 negative events are expected to have variability between conditions similar to the variability between biological replicates. We used RSEM (Li and Dewey 2011) to simulate sequencing reads for the 2 conditions, 3 replicates each, at various depths: 120, 60, 25, 10 and 5 millions of 100nt paired-end reads per sample, and at various read lengths: 100nt, 75nt, 50nt and 25nt, at depth of 25M paired-end reads (Tables S1-S3). Further details of the simulations are given in the Supplementary Material. Datasets and commands to reproduce these simulations are available at [https://github.com/comprna/SUPPA\\_supplementary\\_data](https://github.com/comprna/SUPPA_supplementary_data).

## Experimental datasets

We analyzed RNA-seq data for the double knockdown of TRA2A and TRA2B in MDA-MB-231 cells and controls with 3 replicates per condition (Best et al. 2014) (GSE59335). For benchmarking, we used 83 RT-PCR validated events for comparison (Tables S4-S5) and 44 RT-PCR negative events (Tables S12-S13). We also analyzed data from Cerebellum and Liver mouse tissues covering 8 different time points from 2 full circadian cycles (Zhang et al. 2014) (GSE54651) and performed a comparison with 50 events validated by RT-PCR (Vaquero-Garcia et al. 2016) comparing samples CT28, CT40 and CT52 in Cerebellum with the same circadian time points in Liver (Tables S8-S9). We also analyzed RNA-seq data for stimulated and unstimulated Jurkat T-cells and compared it with RT-PCR validated events (no tested replicates) (Cole et al. 2015; Vaquero-Garcia et al. 2016) (SRP059357) (Tables S10-S11). From these 54 RT-PCR validated events, we only used the 30 events that had experimental value  $|\Delta\text{PSI}| > 0.05$ . For the study of multiple conditions, we used RNA-seq samples from a 4-day time-course for the differentiation of human iPSCs cells into bipolar neurons (Buskamp et al. 2014) (GSE60548). Original data was for days 0,1,3,4 after initiation of differentiation, which we relabeled as days 0,1,2,3 for simplicity. Additionally, we analysed RNA-seq from 5 steps of differentiating human erythroblasts (Pimentel et al. 2016) (GSE53635), with 3 replicates per condition. RNA-seq reads from all experiments were used to quantify human and mouse transcripts from Ensembl (version 75 - without pseudogenes) with Salmon (Patro et al. 2017). Reads were mapped to the human (hg19) or mouse (mm10) genomes using TopHat (Kim et al. 2013a). All methods other than SUPPA2 were used with these mappings. Cassette events from SUPPA2 and rMATS were matched to the RT-PCR validated events in each dataset, considering only those cases where the middle exon matched exactly the validated exons and confirming the flanking exons with the RT-PCR primers when available. Ambiguous matches were discarded from the comparison. For MAJIQ we selected the inclusion junction compatible with the validated event that had the largest posterior probability for  $|\Delta\text{PSI}| > 0.1$ . For DEXSeq we considered only exonic regions that matched exactly with the regulated exon of the

experimentally validated cassette event. To select a set of cassette events common to all four methods, we selected the events measured by both SUPPA2 and rMATS such that the middle exon matched exactly a DEXSeq exonic region and did not appear in more than one event from SUPPA2 or rMATS. From this set, we selected those for which any of the two inclusion junctions was present in MAJIQ, and selected the junction with the largest posterior probability for  $|\Delta\text{PSI}| > 0.1$ . Further details are provided in the Supplementary Material.

## **Time performance**

Running time was measured using the Unix time command *time*. For SUPPA2 running time was measured independently of the transcript quantification step. Similarly, for all other methods the running time did not include the read-mapping step. Time was measured independently for PSI calculation and for differential splicing analysis. All methods were run on a Unix machine with 12Gb of RAM and 8 Intel Xeon 2GHz CPU cores.

## **Experimental validation**

Details on the experimental validation are given in the Supplementary Material.

## **Software and datasets**

SUPPA2 is available at <https://github.com/comprna/SUPPA>

Commands and datasets used in this work are available at [https://github.com/comprna/SUPPA\\_supplementary\\_data](https://github.com/comprna/SUPPA_supplementary_data)

Software for the motif enrichment analysis is available at <https://github.com/comprna/MOSEA>

## **Competing interests**

The authors declare no competing interests.

## **List of abbreviations**

PSI: proportion spliced in, RT-PCR: reverse transcriptase polymerase chain reaction, iPSC: induced pluripotent stem cell, CLIP: cross linking immunoprecipitation, TRA2A/B: Transformer-2 protein homolog alpha/beta, RNA-seq: RNA sequencing, TPM: transcripts per million.

## **Acknowledgements**

The authors thank C. Calixto, J. Brown, R. Zhang, M. Irimia, and N. Barbosa-Morais, for useful discussions and to J. Vaquero-Garcia and Y. Barash for comments on an earlier version of the manuscript. This work was supported by the MINECO and FEDER (BIO2014-52566-R) and AGAUR (SGR2014-1121) and Breast Cancer Now (2014NovPR355). GH is a BBSRC-funded PhD student.

## **Author Contributions**

J.C.E, M.S. and EE designed and implemented the method and algorithms, J.C.E., J.L.T., and E.E. devised the analyses and J.C.E, J.L.T, and M.S. carried out the benchmarking analyses. G.H and D.J.E. produced the datasets related to the double knockdown of TRA2A and TRA2B and performed the validation experiments. B.S. carried out the software development and analysis for motif enrichment analyses. J.C.E, J.L.T. and EE wrote the manuscript with essential input from G.H. and D.J.E.

## References

- Alamancos GP, Agirre E, Eyraas E. 2014. Methods to study splicing from high-throughput RNA sequencing data. *Methods Mol Biol* **1126**: 357–397.
- Alamancos GP, Pagés A, Trincado JL, Eyraas E, Pages A, Trincado JL, Bellora N, Eyraas E. 2015. Leveraging transcript quantification for fast computation of alternative splicing profiles. *RNA* **21**: 1521–1531.
- Anders S, Reyes A, Huber W. 2012. Detecting differential usage of exons from RNA-seq data. *Genome Res* **22**: 2008–17. <http://www.ncbi.nlm.nih.gov/pubmed/22722343>.
- Ankerst M, Breunig MM, Kriegel H, Sander J. 1999. OPTICS: Ordering Points To Identify the Clustering Structure. *ACM Sigmod Rec* **28**: 49–60.
- Best A, James K, Dalglish C, Hong E, Kheirolah-Kouhestani M, Curk T, Xu Y, Danilenko M, Hussain R, Keavney B, et al. 2014. Human Tra2 proteins jointly control a CHEK1 splicing switch among alternative and constitutive target exons. *Nat Commun* **5**: 4760. <http://www.ncbi.nlm.nih.gov/pubmed/25208576>.
- Bray NL, Pimentel H, Melsted P, Pachter L. 2016. Near-optimal probabilistic RNA-seq quantification. *Nat Biotechnol* **34**: 525–7. <http://www.ncbi.nlm.nih.gov/pubmed/27043002>.
- Brown JWS, Calixto CPG, Zhang R. 2016. High-quality reference transcript datasets hold the key to transcript-specific RNA-sequencing analysis in plants. *New Phytol*. <http://www.ncbi.nlm.nih.gov/pubmed/27659901>.
- Busskamp V, Lewis NE, Guye P, Ng AHM, Shipman SL, Byrne SM, Sanjana NE, Murn J, Li Y, Li S, et al. 2014. Rapid neurogenesis through transcriptional activation in human stem cells. *Mol Syst Biol* **10**: 760. <http://www.ncbi.nlm.nih.gov/pubmed/25403753>.
- Cole BS, Tapescu I, Allon SJ, Mallory MJ, Qiu J, Lake RJ, Fan H-Y, Fu X-D, Lynch KW. 2015. Global analysis of physical and functional RNA targets of hnRNP L reveals distinct sequence and epigenetic features of repressed and enhanced exons. *RNA* **21**: 2053–66. <http://www.ncbi.nlm.nih.gov/pubmed/26437669>.
- Ester M, Kriegel HP, Sander J, Xu X. 1996. A Density-Based Algorithm for Discovering Clusters in Large Spatial Databases with Noise. In *Proceedings of the 2nd International Conference on Knowledge Discovery and Data Mining*, pp. 226–231 <https://www.aaai.org/Papers/KDD/1996/KDD96-037.pdf>.
- Froussios K, Mourao K, Barton GJ, Schurch NJ. 2017. Identifying differential isoform abundance with RATs: a universal tool and a warning. *bioRxiv*.
- Galalde DR, Snell EA, Jachimowicz D, Heron AJ, Bruce M, Lloyd J, Warland A, Pantic N, Admassu T, Ciccone J, et al. 2016. Highly parallel direct RNA sequencing on an array of nanopores. *bioRxiv* 68809. <http://biorxiv.org/lookup/doi/10.1101/068809>.
- Hu Y, Huang Y, Du Y, Orellana CF, Singh D, Johnson AR, Monroy A, Kuan PF, Hammond SM, Makowski L, et al. 2013. DiffSplice: The genome-wide detection of differential splicing events with RNA-seq. *Nucleic Acids Res* **41**.
- Irimia M, Weatheritt RJ, Ellis JD, Parikhshak NN, Gonatopoulos-Pournatzis T, Babor M, Quesnel-Vallières M, Tapial J, Raj B, O’Hanlon D, et al. 2014. A highly conserved program of neuronal microexons is misregulated in autistic brains. *Cell* **159**: 1511–23. <http://www.ncbi.nlm.nih.gov/pubmed/25525873>.



- Katz Y, Wang ET, Airoidi EM, Burge CB. 2010. Analysis and design of RNA sequencing experiments for identifying isoform regulation. *Nat Methods* **7**: 1009–15.  
<http://www.ncbi.nlm.nih.gov/pubmed/21057496>.
- Kim D, Pertea G, Trapnell C, Pimentel H, Kelley R, Salzberg SL. 2013a. TopHat2: accurate alignment of transcriptomes in the presence of insertions, deletions and gene fusions. *Genome Biol* **14**: R36. <http://www.ncbi.nlm.nih.gov/pubmed/23618408>.
- Kim KK, Nam J, Mukoyama Y-S, Kawamoto S. 2013b. Rbfox3-regulated alternative splicing of Numb promotes neuronal differentiation during development. *J Cell Biol* **200**: 443–58.  
<http://www.ncbi.nlm.nih.gov/pubmed/23420872>.
- Lahat A, Grellscheid SN. 2016. Differential mRNA Alternative Splicing. In *Field Guidelines for Genetic Experimental Designs in High-Throughput Sequencing*, pp. 105–119, Springer International Publishing, Cham [http://link.springer.com/10.1007/978-3-319-31350-4\\_5](http://link.springer.com/10.1007/978-3-319-31350-4_5).
- Lee Y, Rio DC. 2015. Mechanisms and Regulation of Alternative Pre-mRNA Splicing. *Annu Rev Biochem* **84**: 291–323.
- Li B, Dewey CN. 2011. RSEM: accurate transcript quantification from RNA-Seq data with or without a reference genome. *BMC Bioinformatics* **12**: 323.  
<http://www.ncbi.nlm.nih.gov/pubmed/21816040>.
- Li YI, Sanchez-Pulido L, Haerty W, Ponting CP. 2015. RBFox and PTBP1 proteins regulate the alternative splicing of micro-exons in human brain transcripts. *Genome Res* **25**: 1–13.  
<http://www.ncbi.nlm.nih.gov/pubmed/25524026>.
- Lin E, Li L, Guan Y, Soriano R, Rivers CS, Mohan S, Pandita A, Tang J, Modrusan Z. 2009. Exon array profiling detects EML4-ALK fusion in breast, colorectal, and non-small cell lung cancers. *Mol Cancer Res* **7**: 1466–76. <http://www.ncbi.nlm.nih.gov/pubmed/19737969>.
- Norris AD, Gao S, Norris ML, Ray D, Ramani AK, Fraser AG, Morris Q, Hughes TR, Zhen M, Calarco JA. 2014. A pair of RNA-binding proteins controls networks of splicing events contributing to specialization of neural cell types. *Mol Cell* **54**: 946–59.  
<http://www.ncbi.nlm.nih.gov/pubmed/24910101>.
- Nowicka M, Robinson MD. 2016. DRIMSeq: a Dirichlet-multinomial framework for multivariate count outcomes in genomics. *F1000Research* **5**: 1356.  
<http://www.ncbi.nlm.nih.gov/pubmed/28105305>.
- Patro R, Duggal G, Love MI, Irizarry RA, Kingsford C. 2017. Salmon provides fast and bias-aware quantification of transcript expression. *Nat Methods*.  
<http://www.ncbi.nlm.nih.gov/pubmed/28263959>.
- Patro R, Mount SM, Kingsford C. 2014. Sailfish enables alignment-free isoform quantification from RNA-seq reads using lightweight algorithms. *Nat Biotechnol* **32**: 462–4.  
<http://www.ncbi.nlm.nih.gov/pubmed/24752080>.
- Pimentel H, Parra M, Gee S, Ghanem D, An X, Li J, Mohandas N, Pachter L, Conboy JG. 2014. A dynamic alternative splicing program regulates gene expression during terminal erythropoiesis. *Nucleic Acids Res* **42**: 4031–42.  
<http://www.ncbi.nlm.nih.gov/pubmed/24442673>.
- Pimentel H, Parra M, Gee SL, Mohandas N, Pachter L, Conboy JG. 2016. A dynamic intron retention program enriched in RNA processing genes regulates gene expression during terminal erythropoiesis. *Nucleic Acids Res* **44**: 838–51.  
<http://www.ncbi.nlm.nih.gov/pubmed/26531823>.

- Raj B, Irimia M, Braunschweig U, Sterne-Weiler T, O'Hanlon D, Lin ZY, Chen GI, Easton LE, Ule J, Gingras AC, et al. 2014. A global regulatory mechanism for activating an exon network required for neurogenesis. *Mol Cell* **56**: 90–103.
- Rousseeuw PJ. 1987. Silhouettes: A graphical aid to the interpretation and validation of cluster analysis. *J Comput Appl Math* **20**: 53–65.
- Sebestyén E, Singh B, Miñana B, Pagès A, Mateo F, Pujana MA, Valcárcel J, Eyras E. 2016. Large-scale analysis of genome and transcriptome alterations in multiple tumors unveils novel cancer-relevant splicing networks. *Genome Res* **26**.
- Sebestyén E, Zawisza M, Eyras E. 2015. Detection of recurrent alternative splicing switches in tumor samples reveals novel signatures of cancer. *Nucleic Acids Res* **43**: 1345–56. <http://www.pubmedcentral.nih.gov/articlerender.fcgi?artid=4330360&tool=pmcentrez&rendertype=abstract>.
- Shen S, Park JW, Lu Z, Lin L, Henry MD, Wu YN, Zhou Q, Xing Y. 2014. rMATS: robust and flexible detection of differential alternative splicing from replicate RNA-Seq data. *Proc Natl Acad Sci U S A* **111**: E5593-601. <http://www.ncbi.nlm.nih.gov/pubmed/25480548>.
- Trapnell C, Hendrickson DG, Sauvageau M, Goff L, Rinn JL, Pachter L. 2013. Differential analysis of gene regulation at transcript resolution with RNA-seq. *Nat Biotechnol* **31**: 46–53. <http://dx.doi.org/10.1038/nbt.2450>.
- Vaquero-Garcia J, Barrera A, Gazzara MR, González-Vallinas J, Lahens NF, Hogenesch JB, Lynch KW, Barash Y. 2016. A new view of transcriptome complexity and regulation through the lens of local splicing variations. *Elife* **5**: e11752. <http://www.ncbi.nlm.nih.gov/pubmed/26829591>.
- Venables JP, Brosseau J-P, Gadea G, Klinck R, Prinós P, Beaulieu J-F, Lapointe E, Durand M, Thibault P, Tremblay K, et al. 2013. RBFOX2 is an important regulator of mesenchymal tissue-specific splicing in both normal and cancer tissues. *Mol Cell Biol* **33**: 396–405. <http://www.pubmedcentral.nih.gov/articlerender.fcgi?artid=3554129&tool=pmcentrez&rendertype=abstract>.
- Venables JP, Klinck R, Bramard A, Inkel L, Dufresne-Martin G, Koh C, Gervais-Bird J, Lapointe E, Froehlich U, Durand M, et al. 2008. Identification of alternative splicing markers for breast cancer. *Cancer Res* **68**: 9525–31. <http://www.ncbi.nlm.nih.gov/pubmed/19010929>.
- Wang ET, Sandberg R, Luo S, Khrebtkova I, Zhang L, Mayr C, Kingsmore SF, Schroth GP, Burge CB. 2008. Alternative isoform regulation in human tissue transcriptomes. *Nature* **456**: 470–6. <http://www.ncbi.nlm.nih.gov/pubmed/18978772>.
- Zhang R, Calixto CPG, Marquez Y, Venhuizen P, Tzioutziou NA, Guo W, Spensley M, Entizne JC, Lewandowska D, Ten Have S, et al. 2017. A high quality Arabidopsis transcriptome for accurate transcript-level analysis of alternative splicing. *Nucleic Acids Res* **45**: 5061–5073. <http://www.ncbi.nlm.nih.gov/pubmed/28402429>.
- Zhang R, Calixto CPG, Tzioutziou NA, James AB, Simpson CG, Guo W, Marquez Y, Kalyna M, Patro R, Eyras E, et al. 2015. AtRTD - a comprehensive reference transcript dataset resource for accurate quantification of transcript-specific expression in Arabidopsis thaliana. *New Phytol* **208**.
- Zhang R, Lahens NF, Ballance HI, Hughes ME, Hogenesch JB. 2014. A circadian gene expression atlas in mammals: implications for biology and medicine. *Proc Natl Acad Sci U S A* **111**: 16219–24. <http://www.ncbi.nlm.nih.gov/pubmed/25349387>.



## Figures

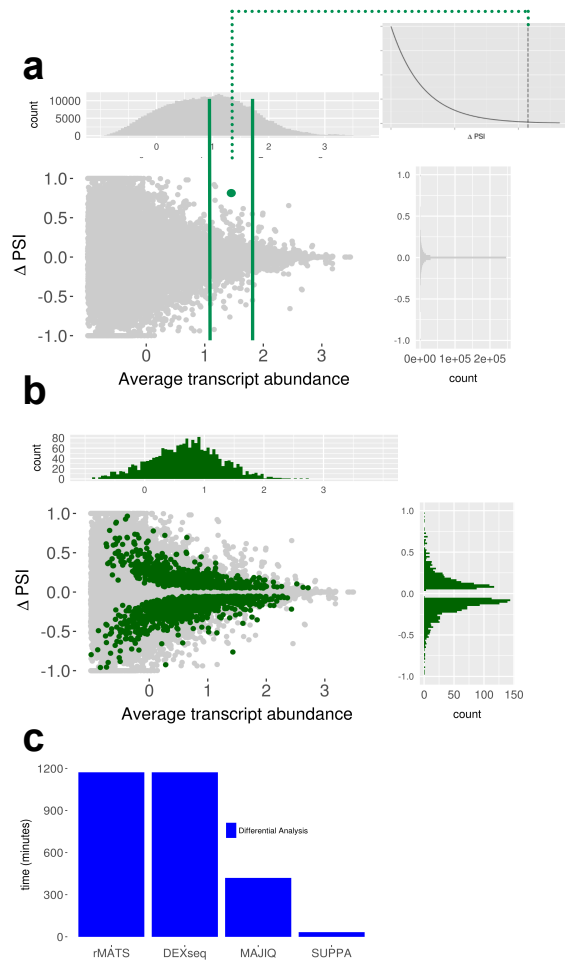

**Figure 1. Overview of SUPPA2 differential splicing and benchmarking analysis.** (a) The central panel displays the  $\Delta$ PSI values between replicates (y-axis) as a function of the average transcript abundance (x-axis), using data from (Best et al. 2015) (Methods). The attached panels display the  $\Delta$ PSI values along the x-axis (top panel) and along the y-axis (right panel). The green dot represents an example of  $\Delta$ PSI observed between conditions and the top-right panel shows the between-replicate  $\Delta$ PSI distribution against which the observed  $\Delta$ PSI is compared. (b) The central panel displays the  $\Delta$ PSI values (y-axis) between conditions (green) or between replicates (gray) as a function of the average transcript abundance (x-axis). Only events with p-value < 0.05 according to SUPPA2 are plotted in green. The attached panels display the distribution of the significant  $\Delta$ PSI values along the x-axis (top panel) and along the y-axis (right panel). (c) Time performance of SUPPA2 compared to rMATS, MAJIQ and DEXSeq in the differential splicing analysis between two conditions, with 3 replicates each (Best et al. 2015). Time (y-axis) is given in minutes and in each case it does not include the read mapping, transcript quantification steps or the calculation of PSI values.

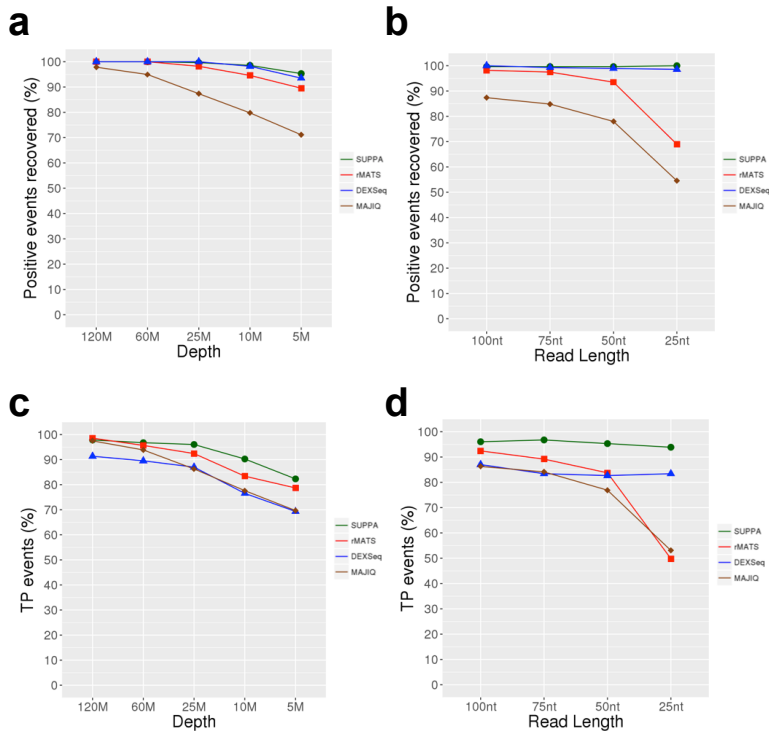

**Figure 2. Benchmarking with simulated data. (a)** Proportion of events measured by each method (y-axis) from the 277 positive simulated cassette events at different sequencing depths (x-axis), from 120 million (120M) down to 5 million (5M) of paired end reads. **(b)** As in (a) but for different read lengths (x-axis) at fixed depth (25M). **(c)** True positive (TP) rate (in terms of percentage) for each method (y-axis) at different sequencing depths (x-axis). TPs were calculated as the number of events with a statistically significant test according to each method: corrected  $p$ -value  $< 0.05$  for SUPPA2, rMATS and DEXSeq; and posterior( $|\Delta\text{PSI}| > 0.1$ )  $> 0.95$  for MAJIQ. **(d)** As in (c) but for different read lengths (x-axis) at fixed depth (25M).

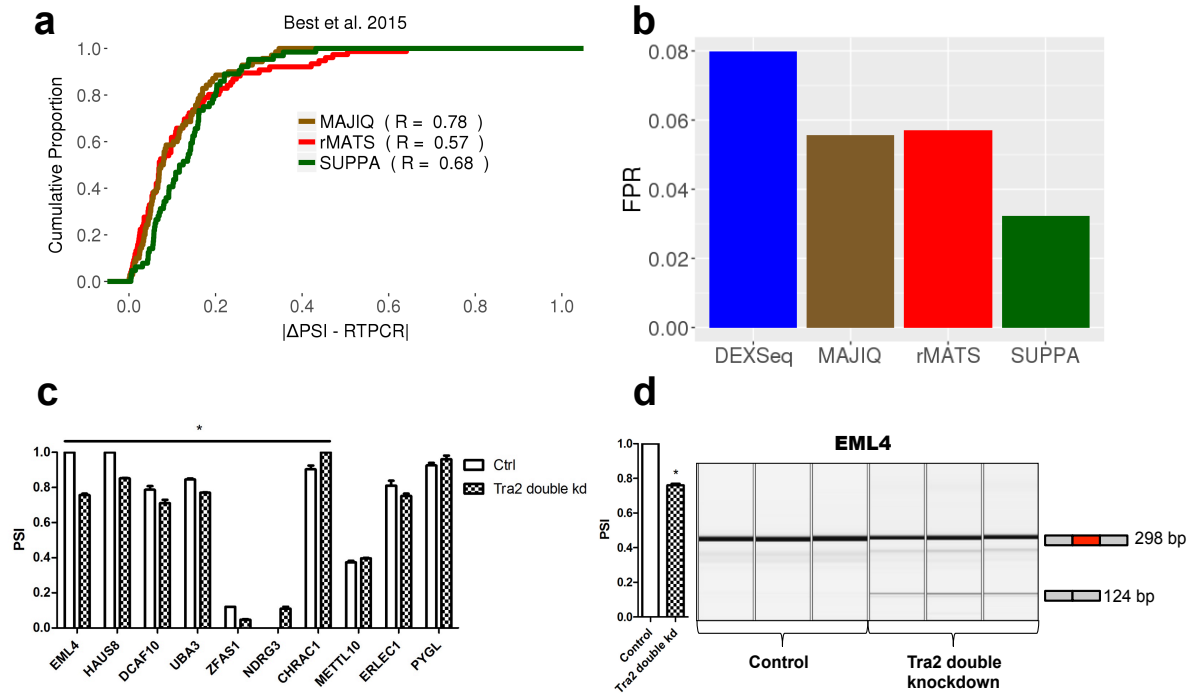

**Figure 3. Experimental validation of differentially splicing predictions by SUPPA2.** (a) Comparison of predicted and experimentally validated  $\Delta\text{PSI}$  values for 83 cassette events differentially spliced between the double knockdown of TRA2A and TRA2B and control in MDA-MB-231 cells. We show the cumulative proportion of cases (y-axis) according to the absolute difference between the predicted and the experimental value ( $|\Delta\text{PSI} - \text{RT-PCR}|$ ), for the events detected by each method: SUPPA2 (66), rMATS (78), and MAJIQ (72). Additionally, we give for each method the Pearson correlation R between predicted and experimental values. (b) False positive rate (FPR) calculated using 44 RT-PCR negative events. FPR was calculated as the proportion of the detected events that was found as significant by each method: SUPPA2 (1/31), rMATS (2/35), MAJIQ (2/36), DEXSeq(2/25). (c) Experimental validation by RT-PCR of a subset of novel events with TRA2B CLIP tags and Tra2 motifs. These events include cases that were only predicted by SUPPA2 (CHRAC1, NDRG3, METTL10), and cases that were not predicted by any method but were significant according to SUPPA2 before multiple test correction (ERLEC1, PYGL, DCAF10, HAUS8, EML4, UBA3) (Table S14). RT-PCR validation was performed in tri-plicate. (d) Experimental validation of a new skipping event in *EML4* upon knockdown of TRA2A and TRA2B (3 biological replicates shown in each case).

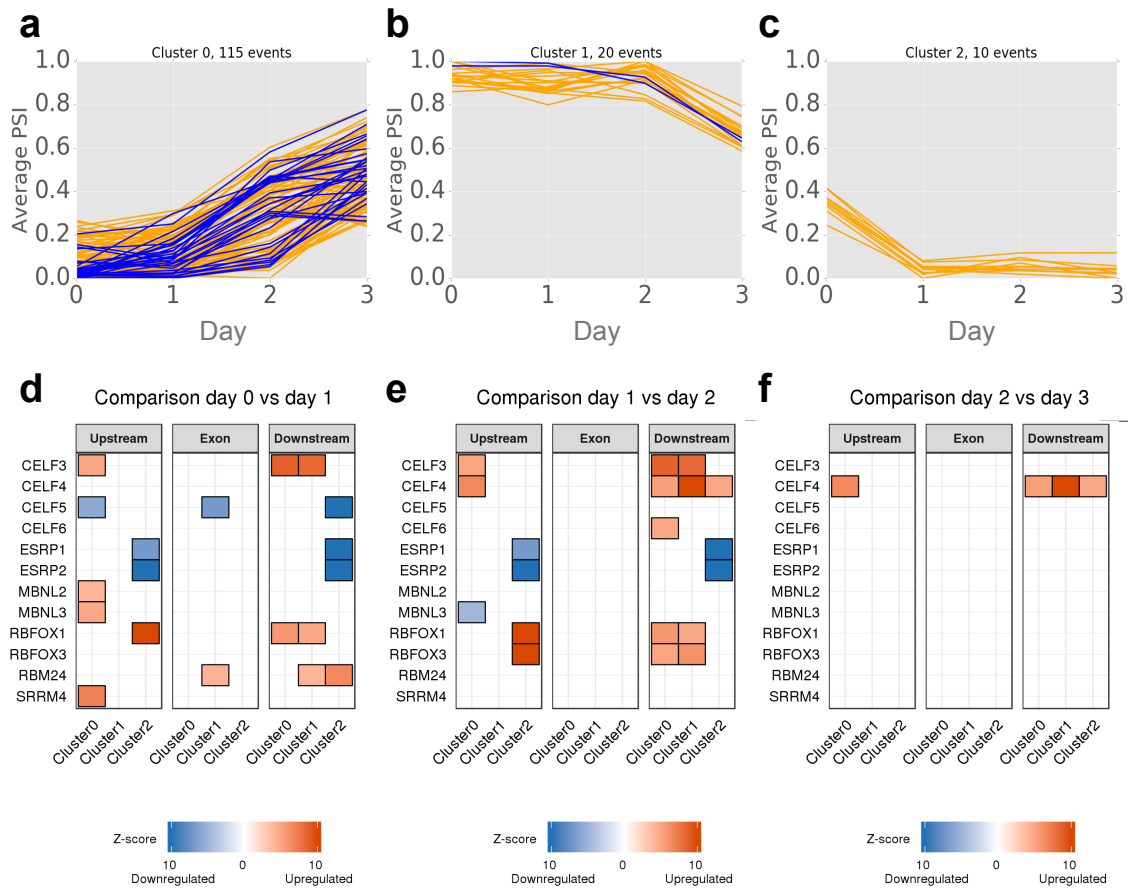

**Figure 4. Prediction and clustering of differentially spliced events across neuronal differentiation.** Density-based clustering performed on the 2197 regulated cassette events that change splicing significantly in at least one comparison between adjacent steps across 4 differentiation stages (days after differentiation 0,1,2,3). Plots (a-c) show the average PSI per stage of the events in the three clusters obtained. Microexons (<28nt) are plotted in blue over the rest of the events in orange. (d-f) Motif enrichment associated to each of the 3 clusters in (a-c) in the regions upstream (200nt), exonic, and downstream (200nt). Only enriched motifs associated to splicing factors that are differentially expressed are shown in each comparison between differentiation stages (days after differentiation 0,1,2,3). Splicing factors that are upregulated or downregulated are indicated in red and blue, respectively. The color intensity indicates the z-score of the motif enrichment in that particular region.
